# Supplementary material for: Inflammatory CSF profiles and longitudinal development of cognitive decline in sporadic and GBA-associated PD
Source: PubMed Central journal article supplement (PMC10008539; doi:10.1038/s41531-023-00476-2), 2023-03-11
Supplement: 41531_2023_476_MOESM1_ESM.pdf [file 41531_2023_476_MOESM1_ESM.pdf]

**Supplemental Table 1: Correlation between CSF inflammatory markers with demographics and clinical characteristics in Dementia with Lewy Bodies**

|                   | Age            | Age at onset                      | Disease duration | H&Y<br>(m n=41; f n=19)            | UPDRS-III<br>(m n=17; f n=4) | MoCA<br>(m n=41; f n=18)           | LEDD<br>(m n=33; f n=15)           |
|-------------------|----------------|-----------------------------------|------------------|------------------------------------|------------------------------|------------------------------------|------------------------------------|
| Eotaxin-1         | n.s.           | n.s.                              | n.s.             | n.s.                               | n.s.                         | n.s.                               | n.s.                               |
| FactorVII         | n.s.           | n.s.                              | n.s.             | n.s.                               | n.s.                         | n.s.                               | n.s.                               |
| ICAM-1            | n.s.           | n.s.                              | n.s.             | n.s.                               | n.s.                         | n.s.                               | n.s.                               |
| Interleukin-1ra   | n.s.           | n.s.                              | n.s.             | n.s.                               | n.s.                         | n.s.                               | n.s.                               |
| Interleukin-2     | n.s.           | n.s.                              | n.s.             | n.s.                               | n.s.                         | t: 0.304* n=43                     | n.s.                               |
| Interleukin-4     | n.s.           | n.s.                              | n.s.             | n.s.                               | n.s.                         | t: 0.359* n=42                     | n.s.                               |
| Interleukin-6     | n.s.           | n.s.                              | n.s.             | n.s.                               | n.s.                         | n.s.                               | n.s.                               |
| Interleukin-7     | n.s.           | n.s.                              | n.s.             | n.s.                               | n.s.                         | t: 0.482** n=35<br>f: 0.742** n=11 | n.s.                               |
| Interleukin-8     | n.s.           | n.s.                              | n.s.             | n.s.                               | n.s.                         | n.s.                               | n.s.                               |
| Interleukin-12p40 | n.s.           | n.s.                              | n.s.             | n.s.                               | n.s.                         | n.s.                               | t: -0.353* n=38<br>m: -0.432* n=26 |
| Interleukin-18    | n.s.           | n.s.                              | n.s.             | t: -0.331* n=53<br>m: -0.353* n=35 | n.s.                         | f: 0.515* n=17                     | n.s.                               |
| MCP-1             | n.s.           | n.s.                              | n.s.             | n.s.                               | n.s.                         | f: 0.565* n=18                     | m: 0.368* n=33                     |
| MIP1-alpha        | n.s.           | n.s.                              | n.s.             | n.s.                               | n.s.                         | n.s.                               | n.s.                               |
| MIP1-beta         | n.s.           | n.s.                              | n.s.             | n.s.                               | m: -0.499* n=17              | n.s.                               | n.s.                               |
| MMP3              | n.s.           | t: 0.255* n=66                    | n.s.             | f: 0.491* n=19                     | n.s.                         | t: -0.275* n=59<br>f: -0.489* n=18 | n.s.                               |
| MMP9              | n.s.           | n.s.                              | n.s.             | n.s.                               | n.s.                         | n.s.                               | n.s.                               |
| SCF               | t: 0.303* n=67 | t: 0.319** n=66<br>f: 0.478* n=21 | f: -0.492* n=21  | n.s.                               | n.s.                         | n.s.                               | t: 0.313* n=48                     |
| TNF-alpha         | n.s.           | n.s.                              | n.s.             | n.s.                               | n.s.                         | n.s.                               | n.s.                               |
| VEGF              | n.s.           | n.s.                              | n.s.             | f: -0.536* n=19                    | n.s.                         | n.s.                               | m: 0.399* n=33                     |

Pearson correlation: \*p<0.05; \*\*p<0.01; n.s. = not significant

t: total; m: males ; f: females

**Supplemental Table 2: Baseline demographic and clinical data from people with Parkinson's Disease stratified by GBA mutation and sex**

|                                   | PD <sub>GBA_WT</sub><br>male n=256 | PD <sub>GBA_WT</sub><br>female<br>n=144 | p-value<br>PD <sub>GBA_WT</sub> | PD <sub>GBA</sub> male<br>n=66 | PD <sub>GBA</sub><br>female n=32 | p-value<br>PD <sub>GBA</sub> |
|-----------------------------------|------------------------------------|-----------------------------------------|---------------------------------|--------------------------------|----------------------------------|------------------------------|
| Age, years                        | 65 ± 10                            | 66 ± 10                                 | 0.398                           | 62 ± 10                        | 65 ± 9                           | 0.136                        |
| Age at onset, years               | 59 ± 11                            | 59 ± 11                                 | 0.836                           | 54 ± 11                        | 56 ± 8                           | 0.321                        |
| Disease duration,<br>years        | 7 ± 5                              | 7 ± 5                                   | 0.204                           | 8 ± 5                          | 9 ± 6                            | 0.479                        |
| H&Y                               | 2.1 ± 0.6                          | 2.1 ± 0.6                               | 0.849                           | 2.2 ± 0.7                      | 2.2 ± 0.7                        | 0.990                        |
| UPDRS-III                         | 27 ± 12                            | 24 ± 11                                 | 0.015                           | 27 ± 12                        | 27 ± 11                          | 0.961                        |
| MoCA                              | 25 ± 4                             | 25 ± 5                                  | 0.981                           | 25 ± 4                         | 24 ± 5                           | 0.751                        |
| LEDD                              | 576 ± 427                          | 532 ± 490                               | 0.356                           | 695 ± 476                      | 538 ± 328                        | 0.101                        |
| Amyloid $\beta_{1-42}$<br>[pg/ml] | 706 ± 264                          | 717 ± 274                               | 0.706                           | 733 ± 267                      | 653 ± 197                        | 0.144                        |
| total-Tau [pg/ml]                 | 224 ± 101                          | 275 ± 158                               | <0.001                          | 252 ± 150                      | 231 ± 93                         | 0.491                        |
| phospho181-Tau<br>[pg/ml]         | 40 ± 16                            | 45 ± 20                                 | 0.003                           | 40 ± 17                        | 39 ± 12                          | 0.814                        |
| NFL [pg/ml]                       | 1065 ± 1031                        | 958 ± 1121                              | 0.358                           | 954 ± 625                      | 800 ± 563                        | 0.250                        |
| $\alpha$ -synuclein [pg/ml]       | 574 ± 254                          | 709 ± 364                               | <0.001                          | 550 ± 228                      | 532 ± 308                        | 0.744                        |
| Eotaxin-1                         | 57.4 ± 7.5                         | 56.4 ± 8.3                              | 0.217                           | 57.3 ± 7.5                     | 58.7 ± 7.0                       | 0.381                        |
| FactorVII                         | 441 ± 191                          | 429 ± 214                               | 0.629                           | 503 ± 224                      | 423 ± 146                        | 0.099                        |
| ICAM-1                            | 516 ± 178                          | 503 ± 184                               | 0.491                           | 517 ± 194                      | 474 ± 154                        | 0.269                        |
| Interleukin-1ra                   | 19.5 ± 8.7                         | 19.0 ± 8.5                              | 0.637                           | 20.7 ± 10.7                    | 19.7 ± 9.2                       | 0.698                        |
| Interleukin-2                     | 10.6 ± 5.8                         | 10.8 ± 5.6                              | 0.838                           | 11.3 ± 6.1                     | 10.5 ± 7.6                       | 0.656                        |
| Interleukin-4                     | 8.08 ± 4.12                        | 8.18 ± 3.88                             | 0.861                           | 9.18 ± 5.29                    | 8.44 ± 4.53                      | 0.559                        |
| Interleukin-6                     | 1.01 ± 0.40                        | 1.08 ± 1.12                             | 0.483                           | 1.07 ± 0.40                    | 0.85 ± 0.27                      | 0.035                        |
| Interleukin-7                     | 4.38 ± 2.73                        | 3.88 ± 2.10                             | 0.151                           | 4.87 ± 3.10                    | 3.80 ± 2.26                      | 0.207                        |
| Interleukin-8                     | 40.8 ± 14.1                        | 40.0 ± 26.1                             | 0.707                           | 42.0 ± 11.8                    | 36.9 ± 11.6                      | 0.050                        |
| Interleukin-12p40                 | 0.12 ± 0.06                        | 0.12 ± 0.05                             | 0.930                           | 0.12 ± 0.06                    | 0.12 ± 0.06                      | 0.679                        |
| Interleukin-18                    | 8.61 ± 4.20                        | 7.61 ± 3.32                             | 0.039                           | 9.12 ± 4.84                    | 8.71 ± 3.63                      | 0.712                        |
| MCP-1                             | 707 ± 241                          | 641 ± 211                               | 0.006                           | 719 ± 223                      | 699 ± 205                        | 0.669                        |
| MIP-1 alpha                       | 9.99 ± 4.82                        | 11.2 ± 4.9                              | 0.158                           | 10.1 ± 4.76                    | 9.92 ± 4.94                      | 0.919                        |
| MIP-1 beta                        | 63.9 ± 19.6                        | 64.2 ± 17.8                             | 0.870                           | 65.8 ± 19.7                    | 64.5 ± 14.7                      | 0.743                        |
| MMP3                              | 158 ± 67                           | 138 ± 59                                | 0.004                           | 142 ± 67                       | 127 ± 70                         | 0.310                        |
| MMP9                              | 6681 ± 3468                        | 7263 ± 3409                             | 0.130                           | 6474 ± 3105                    | 6338 ± 3231                      | 0.851                        |
| SCF                               | 73.1 ± 22.5                        | 77.6 ± 26.1                             | 0.071                           | 77.3 ± 30.5                    | 69.9 ± 20.6                      | 0.217                        |
| TNF-alpha                         | 3.83 ± 1.47                        | 3.52 ± 1.00                             | 0.195                           | 3.14 ± 0.93<br>n=33            | 3.14 ± 0.92<br>n=13              | 0.998                        |
| VEGF                              | 35.9 ± 6.1                         | 34.9 ± 6.2                              | 0.132                           | 37.6 ± 5.9                     | 34.1 ± 5.5                       | 0.005                        |

Data are presented as mean and standard deviation. p-values were calculated by ANOVA
